# Supplementary material for: Deeply Supervised Self-Attention Learning Model for Person Re-Identification
Source: Research Square preprint supplement (doi:10.21203/rs.3.rs-6697924/v1), 2025-06-02

**Problem** : Identify pedestrian from one view and Re-Identify from a different camera view ?

**Proposed Solution** : Deep learning model with self-attention element that extract salient feature and compare pedestrain

**Model design** : Feature extractor , attention module, multi-loss supervision

**Challenges** : in identifying a pair of same pedestrians viewed from different camera ?

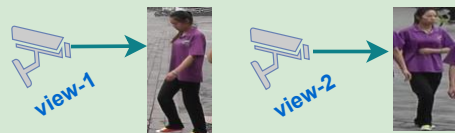

#### Examples of challenges

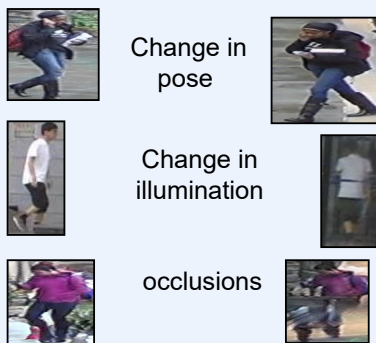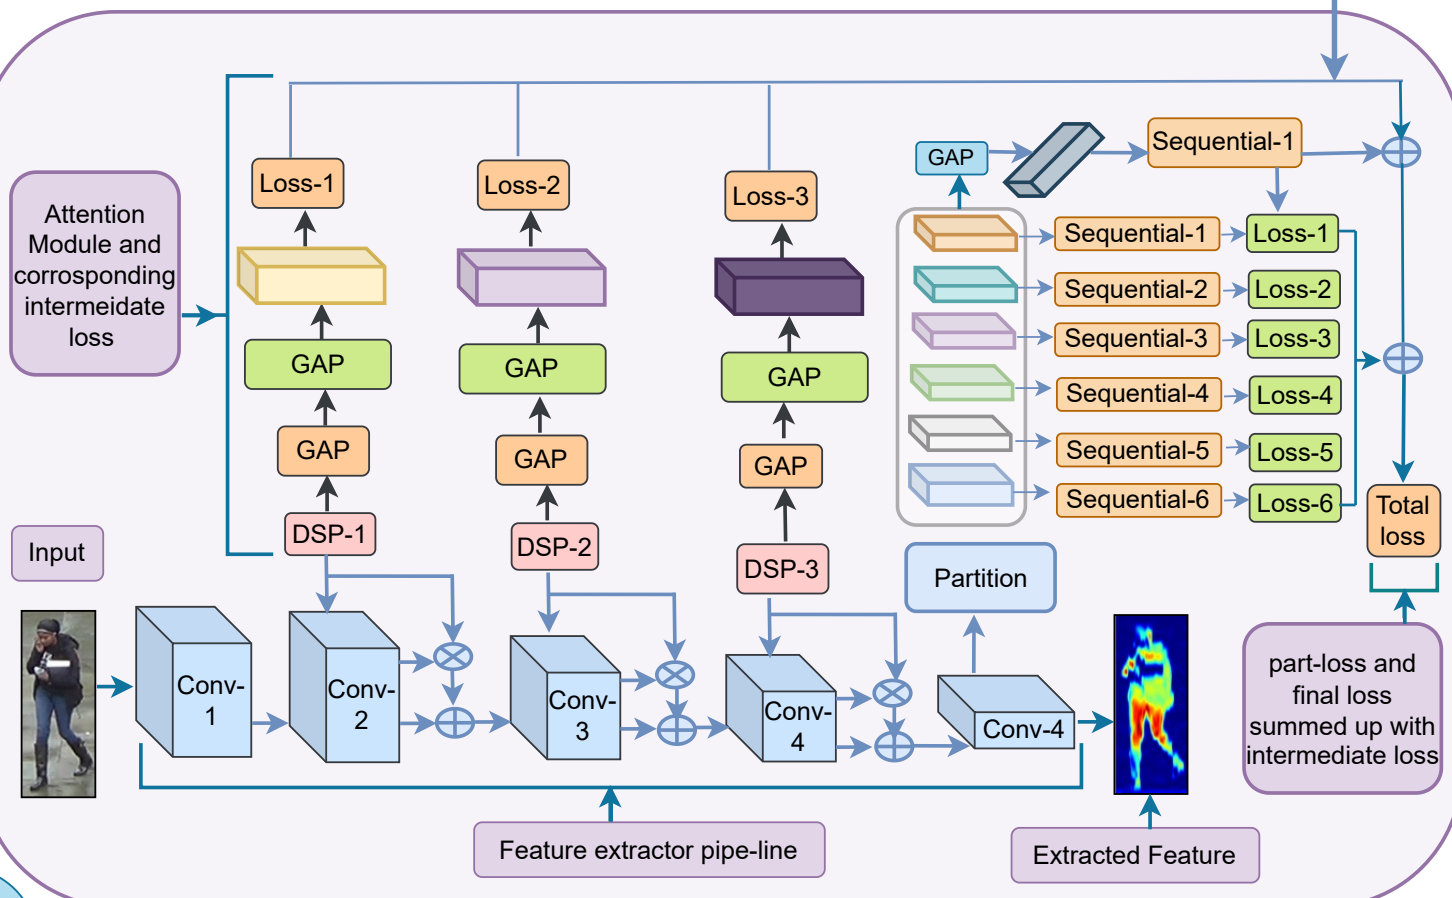

#### Results-1 (Empirical):

- For a given query image, the model was able to fetch the match and the following empirical results show the percentage of correct matches being in  $k^{\text{th}}$  rank:-

| Dataset     | R-1   | R-5   | R-10  |
|-------------|-------|-------|-------|
| Market-1501 | 95.9% | 97.0% | 98.3% |
| DukeMTNC    | 90.9% | 93.8% | 95.0% |

#### Results-1 (qualitative):

- The proposed model extracted efficient features as shown with sample feature

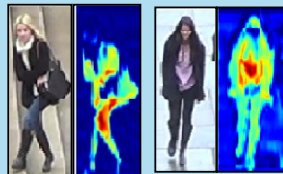

#### Results-2 (qualitative):

- Versatile feature extracted:
- Proposed model vs baseline model:-

Baseline

Proposed

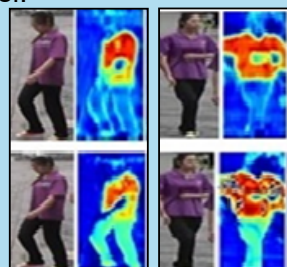

#### Results-3 (qualitative):

Correlation analysis for extracted features

**Baseline**-feature are loosely correlated

**Proposed Model** - exhibit robust feature correlation

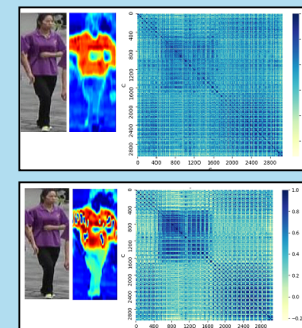

Supplement: Supplementary file 1 [file c73183860d4bb05a22387405.pdf]
